# Supplementary material
Source: PubMed Central journal article supplement (PMC6258837)
Supplement: zjm012186186s1.pdf [file zjm012186186s1.pdf]

# Kenya

# Rift Valley

# Marigat

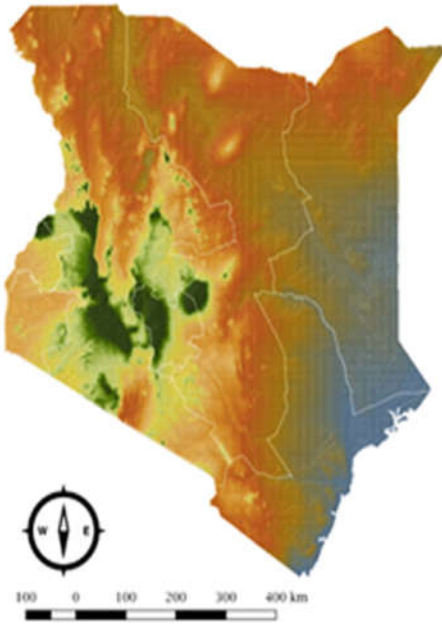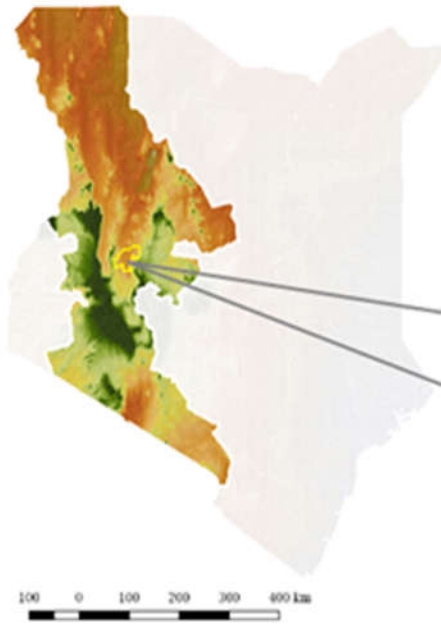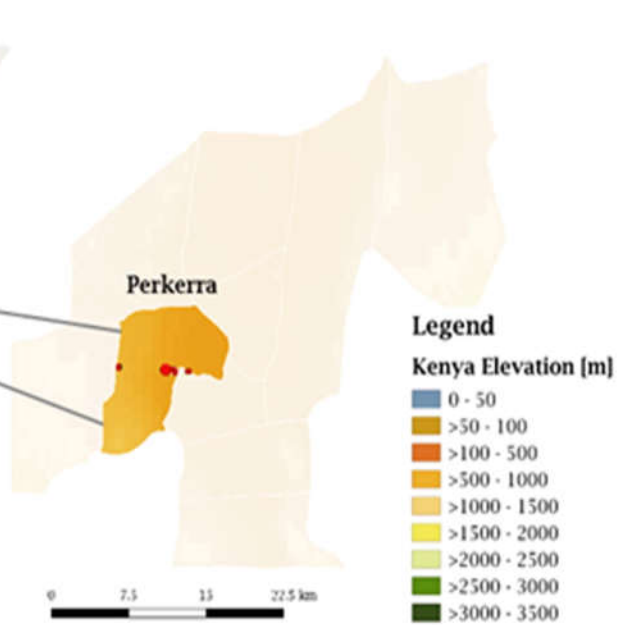

## Perkerra

## Study sites

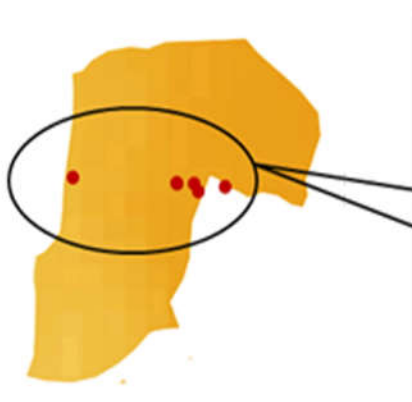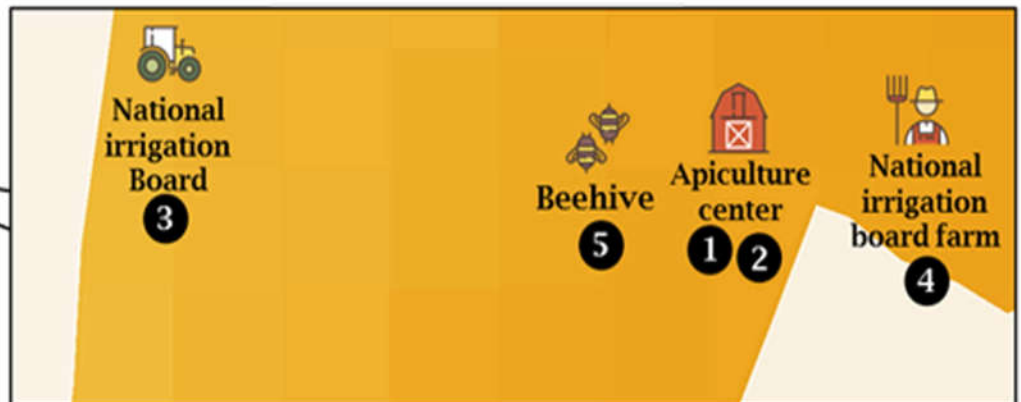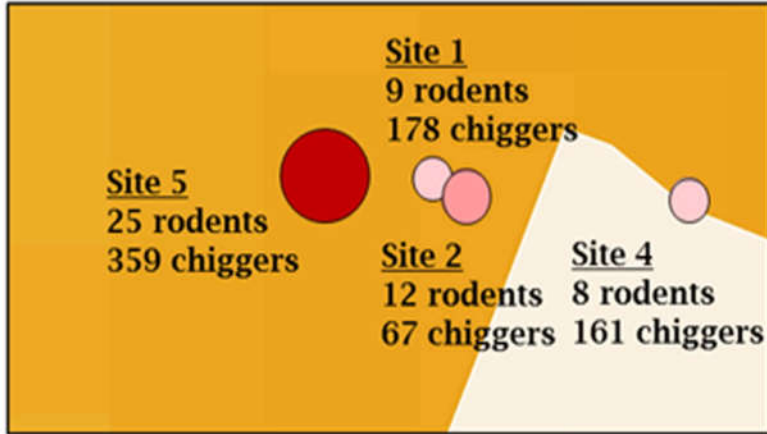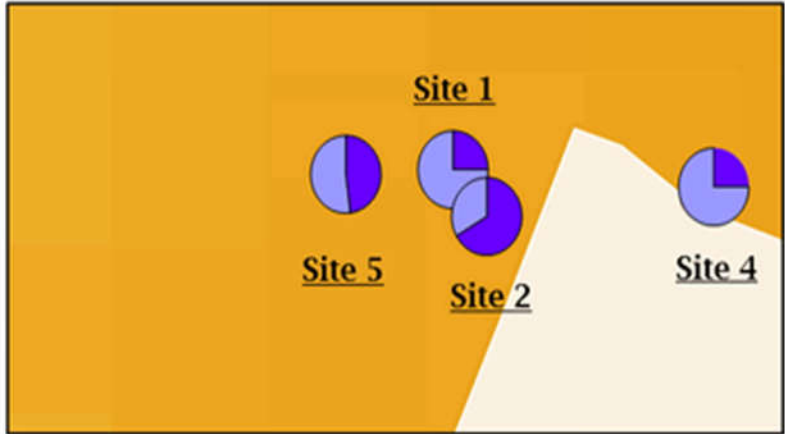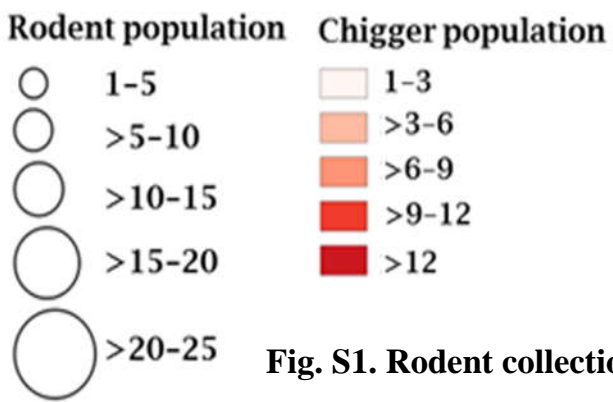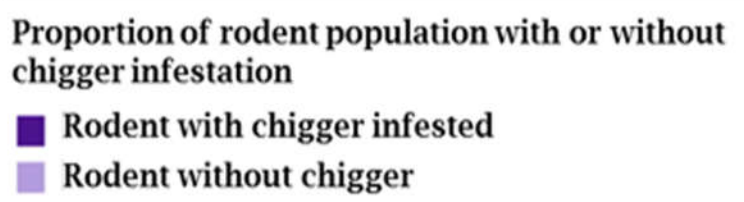

**Fig. S1. Rodent collection sites.** Map of Kenya showing the locations of the 5 trapping sites.
