# Supplementary material
Source: PubMed Central journal article supplement (PMC6258837)
Supplement: zjm012186186s3.pdf [file zjm012186186s3.pdf]

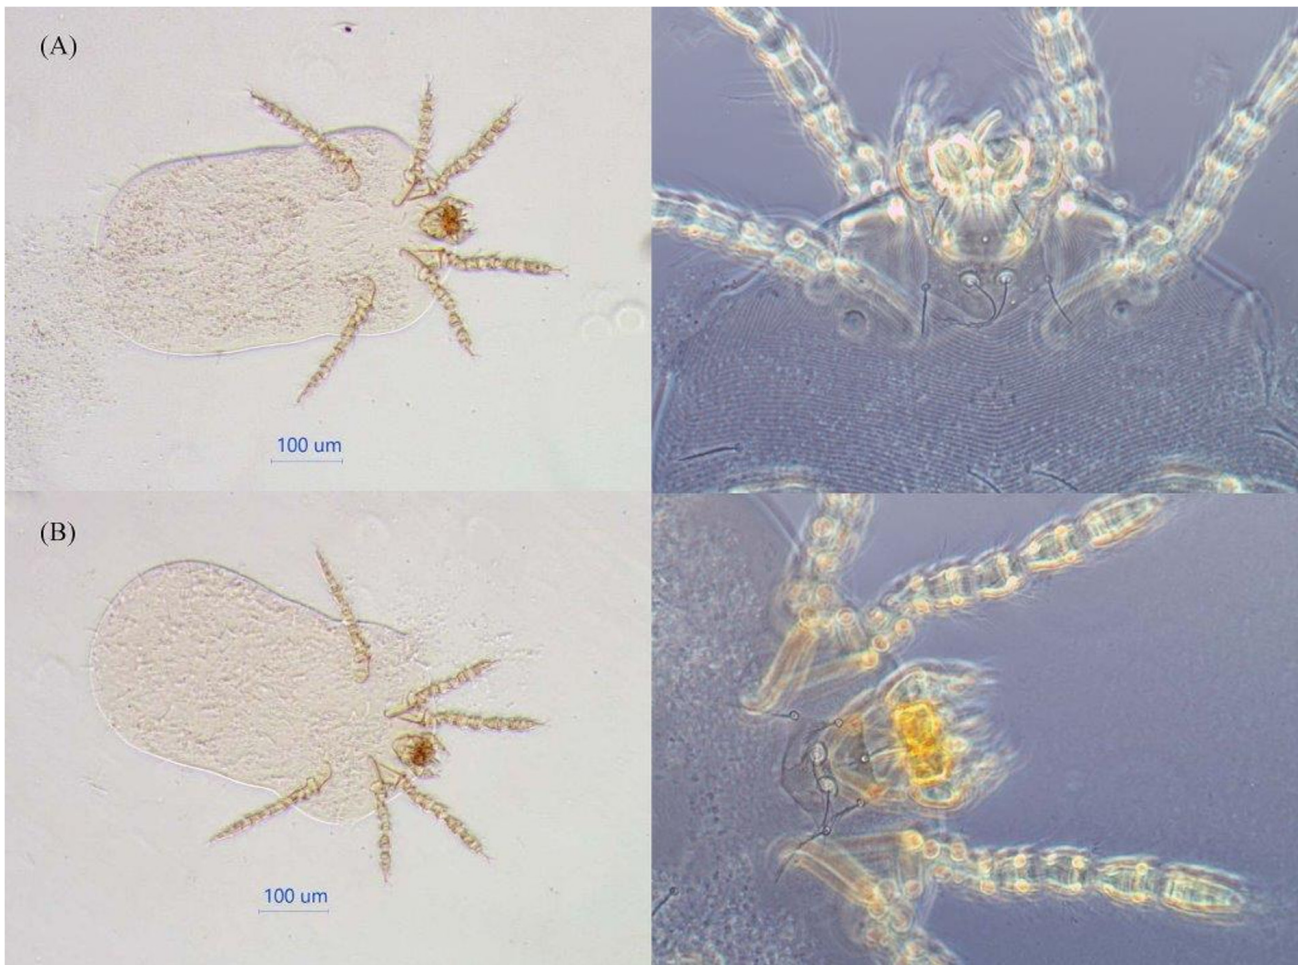

**Fig. S3.** Representative microscopic images of dorsal surface for (A) *Neotrombicula* chigger and (B) *Microtrombicula* chigger collected in this study. The left and right panels were 200 and 400 magnification, respectively.
