# Supplementary material
Source: PubMed Central journal article supplement (PMC6258837)
Supplement: zjm012186186s4.pdf [file zjm012186186s4.pdf]

**(A)**

|                             | 1  | 2     | 3     | 4      | 5      | 6     | 7     | 8     | 9     | 10    | 11    | 12   |
|-----------------------------|----|-------|-------|--------|--------|-------|-------|-------|-------|-------|-------|------|
| Orientia_chuto_Marigat      | 1  | 0.02  | 0.17  | 0.17   | 0.17   | 0.17  | 0.18  | 0.17  | 0.18  | 0.18  | 0.17  | 0.17 |
| O_tsutsugamushi_str_Chuto   | 2  | 97.65 | 0.17  | 0.17   | 0.17   | 0.17  | 0.17  | 0.17  | 0.17  | 0.17  | 0.17  | 0.17 |
| O_tsutsugamushi_str_Kato    | 3  | 84.76 | 85.13 | 0.00   | 0.00   | 0.00  | 0.00  | 0.01  | 0.01  | 0.02  | 0.02  | 0.02 |
| O_tsutsugamushi_str_Ikeda   | 4  | 84.76 | 85.13 | 100.00 | 0.00   | 0.00  | 0.00  | 0.01  | 0.01  | 0.02  | 0.02  | 0.02 |
| O_tutsugamushi (Pkt5)       | 5  | 84.76 | 85.13 | 100.00 | 100.00 | 0.00  | 0.00  | 0.01  | 0.01  | 0.02  | 0.02  | 0.02 |
| O_tutsugamushi (Gm47)       | 6  | 84.76 | 85.13 | 99.75  | 99.75  | 99.75 | 0.00  | 0.01  | 0.01  | 0.01  | 0.02  | 0.02 |
| O_tutsugamushi_str_TH1811   | 7  | 84.26 | 84.63 | 99.50  | 99.50  | 99.50 | 99.50 | 0.01  | 0.01  | 0.02  | 0.02  | 0.02 |
| O_tutsugamushi_str_TH1817   | 8  | 84.76 | 84.88 | 99.26  | 99.26  | 99.26 | 99.26 | 99.01 | 0.01  | 0.02  | 0.02  | 0.02 |
| O_tutsugamushi (Kp47)       | 9  | 84.39 | 84.76 | 99.01  | 99.01  | 99.01 | 99.01 | 98.76 | 99.26 | 0.02  | 0.02  | 0.02 |
| O_tsutsugamushi_str_Sido    | 10 | 84.39 | 84.76 | 98.39  | 98.39  | 98.39 | 98.64 | 98.14 | 97.89 | 0.02  | 0.02  | 0.02 |
| O_tsutsugamushi_str_Boryong | 11 | 84.63 | 84.76 | 98.14  | 98.14  | 98.14 | 98.27 | 98.02 | 97.89 | 97.89 | 0.01  | 0.01 |
| O_tsutsugamushi (Br47)      | 12 | 84.63 | 84.76 | 98.14  | 98.14  | 98.14 | 98.14 | 97.89 | 98.14 | 97.77 | 99.26 | 0.01 |

**(B)**

|                         | 1  | 2     | 3     | 4      | 5      | 6     | 7      | 8     | 9     | 10    | 11    |
|-------------------------|----|-------|-------|--------|--------|-------|--------|-------|-------|-------|-------|
| O.chuto_str_Marigat     | 1  | 0.00  | 0.01  | 0.01   | 0.01   | 0.01  | 0.01   | 0.02  | 0.02  | 0.02  | 0.02  |
| O.chuto_Dubai_NR117903  | 2  | 99.75 | 0.01  | 0.01   | 0.01   | 0.01  | 0.01   | 0.01  | 0.02  | 0.02  | 0.01  |
| O.tsu_Boryong_AM494475  | 3  | 98.50 | 98.75 | 0.00   | 0.00   | 0.00  | 0.00   | 0.00  | 0.01  | 0.01  | 0.01  |
| O.tsu_Kuroki_D38626     | 4  | 98.50 | 98.75 | 100.00 | 0.00   | 0.00  | 0.00   | 0.00  | 0.01  | 0.01  | 0.01  |
| O.tsu_Karp_NR025860     | 5  | 98.50 | 98.75 | 100.00 | 100.00 | 0.00  | 0.00   | 0.00  | 0.01  | 0.01  | 0.01  |
| O.tsu_Kato_D38624       | 6  | 98.75 | 99.00 | 99.75  | 99.75  | 99.75 | 0.00   | 0.01  | 0.01  | 0.01  | 0.01  |
| O.tsu_Ikeda_AP008981-RC | 7  | 98.75 | 99.00 | 99.75  | 99.75  | 99.75 | 100.00 | 0.01  | 0.01  | 0.01  | 0.01  |
| O.tsu_TH1817_AF479300   | 8  | 98.25 | 98.50 | 99.75  | 99.75  | 99.75 | 99.50  | 99.50 | 0.00  | 0.01  | 0.02  |
| O.tsu_Gilliam_D38622    | 9  | 98.00 | 98.25 | 99.50  | 99.50  | 99.50 | 99.25  | 99.25 | 99.75 | 0.01  | 0.01  |
| O.tsu_Kawasaki_D38625   | 10 | 97.75 | 98.00 | 99.25  | 99.25  | 99.25 | 99.00  | 99.00 | 99.00 | 99.25 | 0.02  |
| O.tsu_Shimokoshi_D38627 | 11 | 98.25 | 98.50 | 98.75  | 98.75  | 98.75 | 99.00  | 99.00 | 98.50 | 98.75 | 98.50 |

**Fig. S4. Pairwise comparison between study OTU (*O. chuto* strain Marigat) and previously published *Orientia* strains.** Panel A shows the percent pairwise divergence with the TSA47 gene of the study OTU against other *Orientia* species. The study OTU was closest to what was previously known as *O. tsutsugamushi* strain Chuto. Panel B shows percent pairwise divergence with the 16S rRNA gene of the study OTU against other *Orientia* species. The study OTU was more homologous to *O. chuto* strain Dubai. In both panels, the lower half of the table represents percent identity, while the top half represents Jukes Cantor distances between two sequences.
