# Supplementary material
Source: PubMed Central journal article supplement (PMC6258837)

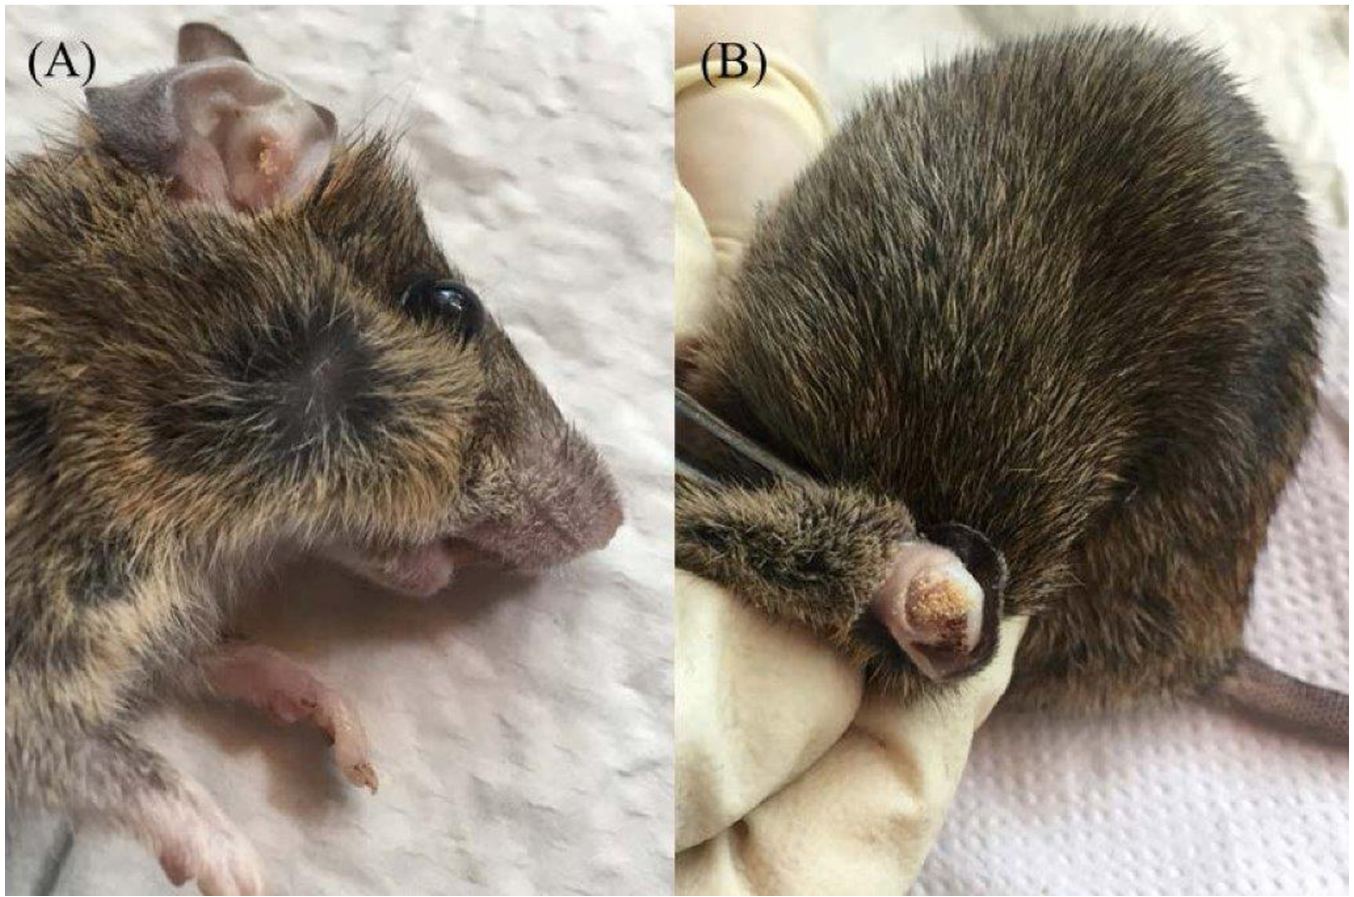

**Fig. S2.** Chigger infestation in the ears of wild rodents caught in Marigat, Baringo County, Kenya.

Supplement: zjm012186186s2.pdf [file zjm012186186s2.pdf]
